# Supplementary material
Source: ML conference proceedings conference paper supplement (https://proceedings.neurips.cc/paper_files/paper/2024/hash/aebf4822d30c3f2600566af7eba83548-Abstract.html)
Supplement: Supplementary file 1 [file aebf4822d30c3f2600566af7eba83548-Supplemental-Datasets_and_Benchmarks_Track.pdf]

665 **Appendix**

666 **Table of Contents**

|     |                                                                                        |           |
|-----|----------------------------------------------------------------------------------------|-----------|
| 667 | <b>A UNLEARNCANVAS Dataset Details</b>                                                 | <b>18</b> |
| 668 | A.1 Motivation . . . . .                                                               | 18        |
| 669 | A.2 Composition: Styles and Object Classes . . . . .                                   | 18        |
| 670 | A.3 Collection and Labeling Process . . . . .                                          | 18        |
| 671 | A.4 Uses . . . . .                                                                     | 18        |
| 672 | A.5 Distribution . . . . .                                                             | 18        |
| 673 | A.6 Maintenance . . . . .                                                              | 18        |
| 674 | A.7 Author Statements . . . . .                                                        | 19        |
| 675 | <b>B Reproducibility Statement and Detailed Experiment Settings</b>                    | <b>19</b> |
| 676 | B.1 Finetuning Style and Object Classifier with UNLEARNCANVAS . . . . .                | 19        |
| 677 | B.2 Finetuning Stable Diffusion with UNLEARNCANVAS . . . . .                           | 19        |
| 678 | B.3 Implementation of DM Unlearning Methods Studied in This Work . . . . .             | 19        |
| 679 | B.4 Evaluation Details of the Adversarial Prompt Generation for Unlearning Robustness  | 21        |
| 680 | B.5 Experiment Details of the Style-Object Combination Unlearning . . . . .            | 21        |
| 681 | B.6 Experiment Details of Sequential Unlearning . . . . .                              | 22        |
| 682 | B.7 Metrics Summary in All Unlearning Settings . . . . .                               | 23        |
| 683 | <b>C A Detailed Comparison between UNLEARNCANVAS and WIKIART</b>                       | <b>24</b> |
| 684 | <b>D Additional Experiment Results for Unlearning Evaluation</b>                       | <b>25</b> |
| 685 | D.1 Visualization of the Style and Object Unlearning Performance . . . . .             | 25        |
| 686 | D.2 A Fine-Grained Comparison per Unlearning Target: ESD vs. SALUN . . . . .           | 25        |
| 687 | D.3 Unlearning Heatmaps of More Unlearning Methods . . . . .                           | 25        |
| 688 | D.4 Understanding Unlearning Method’s Behavior via Unlearning Directions . . . . .     | 28        |
| 689 | D.5 MU Methods Evaluation in Sequential Unlearning . . . . .                           | 28        |
| 690 | <b>E Visualizations</b>                                                                | <b>30</b> |
| 691 | E.1 Illustrations of the Styles and Objects in UNLEARNCANVAS . . . . .                 | 30        |
| 692 | E.2 Visualization of Style Unlearning . . . . .                                        | 31        |
| 693 | E.3 Visualization of the Unlearning Performance in the Presence of Adversarial Prompts | 31        |
| 694 | <b>F Broader Use Cases of UNLEARNCANVAS</b>                                            | <b>34</b> |
| 695 | F.1 Benchmarking Style Transfer using UNLEARNCANVAS . . . . .                          | 34        |
| 696 | F.2 Other Possible Applications of UNLEARNCANVAS . . . . .                             | 36        |
| 697 | <b>G Impact Statement</b>                                                              | <b>37</b> |

## 698 **A UNLEARNCANVAS Dataset Details**

699 In this section, we provide a detailed description of the dataset following ‘datasheet for datasets’ [72].

### 700 **A.1 Motivation**

701 This dataset is collected to enable a precise, comprehensive, and automated quantitative evaluation  
702 framework for MU (machine unlearning) methods in DMs (diffusion models). The current evaluation  
703 plans used in the existing literature have exposed several weaknesses, which may lead to incomplete,  
704 inaccurate or even biased results, see a more detailed discussion in Sec. 2. To the best of our  
705 knowledge, there are no datasets specifically designed to meet the assessing requirements of DM  
706 unlearning. Therefore, UNLEARNCANVAS is designed, collected, and made to fill in this gap.

### 707 **A.2 Composition: Styles and Object Classes**

708 There are 60 predetermined artistic styles provided by Fotor [11]. The images in the same artistic  
709 style all share high stylistic consistency, which enables a high-precision style classifier to be trained  
710 on them. In Fig. A10, we list some examples of the images in each style to illustrate these styles.  
711 There are 20 distinct object classes in UNLEARNCANVAS. In Fig. A11, we list some examples of the  
712 images in each object to illustrate these classes.

### 713 **A.3 Collection and Labeling Process**

714 The construction of UNLEARNCANVAS involves two main steps: seed image collection and sub-  
715 sequent image stylization; see Fig. 2 for an illustration. For seed image collection, a set of high-  
716 resolution real-world photos are collected from Pexels [69], providing open-sourced photographs.  
717 There are 20 seed images collected for each of the 20 object classes; see Fig. A11. After collecting  
718 the seed images, we stylize each and every seed image into all 60 predetermined artistic styles;  
719 see Fig. A10 with Fotor [11]. After the stylization of all the images, the dataset is structured in a  
720 hierarchical manner, and each image is labeled with both its style and object classes. In order to  
721 support text-to-image training, each image is annotated with the prompt ‘An image of *object* in *style*.’  
722

### 723 **A.4 Uses**

724 UNLEARNCANVAS can be used to evaluate MU methods in different unlearning scenarios. Please  
725 see Sec. 4 for more details. In addition, we stress that UNLEARNCANVAS can be used for more  
726 real-world tasks than unlearning, and we provide an example of how UNLEARNCANVAS can be used  
727 to systematically evaluate another generative task, style transfer, in Appx. F. We provide very detailed  
728 instructions with codes in the GitHub code repository.

### 729 **A.5 Distribution**

730 UNLEARNCANVAS is an open-sourced dataset and is based on the existing open-sourced data [69].  
731 We make access to the dataset public under the MIT license. We remark that no personally identifiable  
732 information or offensive content is included in this dataset. The dataset can be accessed either through  
733 Google Drive and HuggingFace. More resources on the dataset, such as the introduction video and  
734 the benchmark, can be found in the official *project webpage*.

### 735 **A.6 Maintenance**

736 The dataset will be maintained by the lead author Yihua Zhang. If needed, the email for contacting is  
737 zhan1908@msu.edu. The dataset may be updated if needed (with the inclusion of more seed images,  
738 more artistic styles, and more objects). The updates will be ad-hoc and will not be periodical. Each  
739 time the dataset is updated, the updates will be reflected in the same GitHub code repository.

740 **A.7 Author Statements**

741 The collector and the lead author of this dataset, Yihua Zhang, bears full responsibility for any  
742 violation of rights that may arise from the collection of the data included in this research.

743 **B Reproducibility Statement and Detailed Experiment Settings**

744 In this section, we provide detailed instructions on the reproduction of our results in Sec. 4, including  
745 the settings of training, the implementation details of the tested machine unlearning methods, and the  
746 evaluation details in each unlearning scenario.

747 **B.1 Finetuning Style and Object Classifier with UNLEARNCANVAS**

748 Style and object classifiers need to be trained as part of the testbed proposed in our evaluation  
749 pipeline (Fig. 4). Here, we adopted a ViT-L/16 model [68] pretrained on ImageNet and finetune it on  
750 UNLEARNCANVAS. UNLEARNCANVAS are split into the train set and test set with a ratio of 9 : 1.  
751 After hyper-parameter tuning, the classifiers are trained with Adam optimizer at a learning rate of  
752 0.01 for 10 epochs.

753 **B.2 Finetuning Stable Diffusion with UNLEARNCANVAS**

754 The other part of the testbed is a diffusion model capable of generating high quality images in all  
755 the styles associated with all the objects encompassed in UNLEARNCANVAS in order to guarantee a  
756 trustworthy and unbiased evaluation.

757 **Training settings.** Practically, we finetune the pretrained Stable Diffusion (SD) v1.5 on UN-  
758 LEARNCANVAS for 20k steps with a learning rate of  $1e - 6$ . Unless otherwise stated, we strictly  
759 follow the training configurations used in Stable Diffusion [1]. For each image in UNLEARN-  
760 CANVAS, we annotate the data with text prompt An image of  $\{object\}$  in  $\{style\}$ , where  
761 the *object* and *style* are the corresponding object and style label. For seed images, the *style* la-  
762 bel we use is ‘photo’ style. We use the training scripts provided by Diffuser official tutorial  
763 (<https://huggingface.co/docs/diffusers/v0.13.0/en/training/text2image>) and the  
764 pretraining model card is runwayml/stable-diffusion-v1-5. During training, the checkpoints  
765 will be saved every 1000 steps.

766 **Evaluation.** To evaluate the quality of the saved checkpoints and select the best one for unlearning  
767 study, the checkpoints are first used to generate an image set with the same prompt as training (An  
768 image of  $\{object\}$  in  $\{style\}$ ) by traversing all the possible style and object labels. Each  
769 prompt are used to generate 5 images with different random seed. Each image are sampled with 100  
770 steps with a guidance coefficient of 9. The image set for each checkpoint are fed into the style and  
771 object classifier trained in Appx. B.1. The model with the highest average performance on all the  
772 styles and objects are selected as the testbed for MU study. The classification performance are also  
773 used as a reference for later IRA/CRA comparison, which are disclosed in the first row of Fig. 5 (left).

774 **Computing resource.** In this work, we employ  $40 \times$  NVIDIA RTX A6000 GPUs to conduct all the  
775 model training, unlearning, image generation, and evaluations. When we finetuned the StableDiffu-  
776 sion on UNLEARNCANVAS,  $8 \times$  GPUs were used for parallel computing. Other experiments were all  
777 carried out in a single-GPU environment. Around 60,000 GPU hours in total were spent to complete  
778 all the experiments.

779 **B.3 Implementation of DM Unlearning Methods Studied in This Work**

780 In this work, we inspected a series of stateful MU methods for DMs. For each method, we use their  
781 publicly released source codes as code bases, which are listed below:

- 782 • ESD [23]: <https://github.com/rohitgandikota/erasing>
- 783 • CA [25]: <https://github.com/nupurkmr9/concept-ablation>
- 784 • UCE [24]: <https://github.com/rohitgandikota/unified-concept-editing>
- 785 • FMN [28]: <https://github.com/SHI-Labs/Forget-Me-Not>
- 786 • SalUn: [27]: <https://github.com/OPTML-Group/Unlearn-Saliency>
- 787 • SEOT: [30]: <https://github.com/sen-mao/SuppressEOT>
- 788 • SPM: [26]: <https://github.com/Con6924/SPM>
- 789 • EDiff: [31]: <https://github.com/JingWu321/EraseDiff>
- 790 • SHS: [32]: <https://github.com/JingWu321/Scissorhands>

791 In particular, we adopt the following training settings to adapt the methods to our dataset:

- 792 • ESD: Based on the suggestions from the authors, ESD is used to only finetune the cross  
793 attention-related model weights (ESD-x). Other settings strict follow the ones used in the  
794 paper.
- 795 • CA: In order to ablate concepts using CA, we first use ChatGPT to generate a list of simple  
796 prompts for each concept (including the styles and the objects), namely anchor prompts.  
797 Each anchor prompt is a simple one-sentence description of the unlearning target.
- 798 • UCE: This method requires a guided concept (prompt) for each unlearning concept. For  
799 style unlearning, we use the prompt An image in *{style\*}* as the guided concept, where  
800 *style\** represents the next style in UNLEARNCANVAS in alphabetical order. Similarly, An  
801 image of *object\** is used for object unlearning, where *object\** is the next object in  
802 UNLEARNCANVAS in alphabetical order.
- 803 • FMN: This method requires the images associated with the unlearning target. For simplicity  
804 and best performance, we randomly select 20 images associated with the unlearning concept.  
805 For the first stage of FMN, we run text inversion for 500 steps with a learning rate of  $1e-4$ ,  
806 and for the second step, we used the inversed text to unlearn the cross attention layers of the  
807 model for 100 steps. The hyper-parameters of learning rate, maximum steps, and tunable  
808 parameters (cross-attention or non-cross-attention) are carefully tuned with grid search.
- 809 • SalUn: This method involves two steps, the mask finding (weight saliency analysis) and the  
810 model unlearning. For mask finding, we tuned the mask ratio, while for unlearning, we tune  
811 the hyper-parameter learning rate and unlearning intensity. All the parameters are tuned  
812 with grid search. For both steps, the mask or model is trained with 10 epochs.
- 813 • SEOT: To generate unlearned images, we use the prompt An *{object\*}* image in  
814 *{style\*}*. We then suppress either *object\** or *style\** individually. Other settings  
815 strict follow the ones used in the paper.
- 816 • SPM: Following the hyperparameters provided by the authors, we trained and obtained  
817 Pre-tuned SPMs for all *object\** and *style\**. During image generation, we combine the  
818 pre-tuned SPMs with the DM. By calculating the association between words in the prompt  
819 and the target word, we determine whether to allow the specified word to preserve, and  
820 generate the corresponding image.
- 821 • EDiff: Based on the authors’ suggestions, EDiff is used to finetune only the cross-attention-  
822 related model weights (EraseDiff-x). During the unlearning process, we adjusted the  
823 hyperparameters, specifically the learning rate and the number of unlearning epochs. The  
824 model is trained with 5 epochs.
- 825 • SHS: SHS consists of two stages: trimming and repairing. During the trimming stage, certain  
826 weights are re-initialized. The repairing stage then restores the model’s utility. Throughout  
827 the unlearning process, we finetuned the hyperparameters, focusing on the learning rate and  
828 the number of unlearning epochs. Ultimately, we selected 2 epochs as the optimal number.

## 829 B.4 Evaluation Details of the Adversarial Prompt Generation for Unlearning Robustness

830 In Sec. 4, we evaluated the robustness of different MU methods against adversarial prompts. Here,  
831 we use the state-of-the-art method, UnlearnDiffAtk [59] to generate adversarial prompts. We set the  
832 prepended prompt perturbations by  $N = 5$  tokens for both style and object unlearning. Following the  
833 original attack setting in UnlearnDiffAtk [59], to optimize the adversarial perturbations, we sample  
834 50 diffusion time steps and perform PGD running for 40 iterations with a learning rate of 0.01 at each  
835 step. Prior to projection onto the discrete text space, we utilize the AdamW optimizer.

## 836 B.5 Experiment Details of the Style-Object Combination Unlearning

837 **Unlearning targets.** In Sec. 4, we evaluate the capability of different MU methods on performing  
838 unlearning at a finer scale, and we use the style-object combinations as unlearning targets for evalua-  
839 tion. Ideally, the UNLEARNCANVAS dataset can generate 1200 ( $60 \times 20$ ) style-object combinations.  
840 In this work, we randomly select 50 of these combinations for evaluation and we list these combina-  
841 tions below. For each method, the same hyper-parameters are used for each MU method as the ones  
842 for style and object unlearning in Tab. 2. The unlearning targets include:

- 843 • ‘An image of Architectures in Abstractionism style.’
- 844 • ‘An image of Bears in Artist Sketch style.’
- 845 • ‘An image of Birds in Blossom Season style.’
- 846 • ‘An image of Butterfly in Bricks style.’
- 847 • ‘An image of Cats in Byzantine style.’
- 848 • ‘An image of Dogs in Cartoon style.’
- 849 • ‘An image of Fishes in Cold Warm style.’
- 850 • ‘An image of Flame in Color Fantasy style.’
- 851 • ‘An image of Flowers in Comic Etch style.’
- 852 • ‘An image of Frogs in Crayon style.’
- 853 • ‘An image of Horses in Cubism style.’
- 854 • ‘An image of Human in Dadaism style.’
- 855 • ‘An image of Jellyfish in Dapple style.’
- 856 • ‘An image of Rabbits in Defoliation style.’
- 857 • ‘An image of Sandwiches in Early Autumn style.’
- 858 • ‘An image of Sea in Expressionism style.’
- 859 • ‘An image of Statues in Fauvism style.’
- 860 • ‘An image of Towers in French style.’
- 861 • ‘An image of Trees in Glowing Sunset style.’
- 862 • ‘An image of Waterfalls in Gorgeous Love style.’
- 863 • ‘An image of Architectures in Greenfield style.’
- 864 • ‘An image of Bears in Impressionism style.’
- 865 • ‘An image of Birds in Ink Art style.’
- 866 • ‘An image of Butterfly in Joy style.’
- 867 • ‘An image of Cats in Liquid Dreams style.’
- 868 • ‘An image of Dogs in Magic Cube style.’
- 869 • ‘An image of Fishes in Meta Physics style.’
- 870 • ‘An image of Flame in Meteor Shower style.’

- 871 • ‘An image of Flowers in Monet style.’
- 872 • ‘An image of Frogs in Mosaic style.’
- 873 • ‘An image of Horses in Neon Lines style.’
- 874 • ‘An image of Human in On Fire style.’
- 875 • ‘An image of Jellyfish in Pastel style.’
- 876 • ‘An image of Rabbits in Pencil Drawing style.’
- 877 • ‘An image of Sandwiches in Picasso style.’
- 878 • ‘An image of Sea in Pop Art style.’
- 879 • ‘An image of Statues in Red Blue Ink style.’
- 880 • ‘An image of Towers in Rust style.’
- 881 • ‘An image of Waterfalls in Sketch style.’
- 882 • ‘An image of Architectures in Sponge Dabbed style.’
- 883 • ‘An image of Bears in Structuralism style.’
- 884 • ‘An image of Birds in Superstring style.’
- 885 • ‘An image of Butterfly in Surrealism style.’
- 886 • ‘An image of Cats in Ukiyoe style.’
- 887 • ‘An image of Dogs in Van Gogh style.’
- 888 • ‘An image of Fishes in Vibrant Flow style.’
- 889 • ‘An image of Flame in Warm Love style.’
- 890 • ‘An image of Flowers in Warm Smear style.’
- 891 • ‘An image of Frogs in Watercolor style.’
- 892 • ‘An image of Horses in Winter style.’

893 **Evaluation.** The evaluation of the style-object combination unlearning concerns four quantitative  
894 metrics, one for unlearning effectiveness and three for retainability. Before the evaluation, an answer  
895 set will be generated exactly following the same procedure introduced in Sec. 3 and Fig. 4 after  
896 unlearning each target. First, the UA (unlearning accuracy) will be evaluated for each answer set,  
897 which stands for the ratio of images generated by the target prompt that are neither classified into the  
898 target object nor the target style class. A high UA denotes a better ability to successfully unlearn the  
899 target combination. Second, the retainability of generation associated with those prompts close to  
900 the unlearning target prompt will be evaluated. These prompts can be divided into two groups, the  
901 ones sharing the same style but not the object class and the ones sharing the object but not the style  
902 class. The classification accuracy of the former corresponds to the retainability of the style, *i.e.*, style  
903 consistency (SC), while the latter one denotes the object consistency (OC). These two quantitative  
904 metrics evaluate how well the unlearning method precisely define the unlearning scope and retain the  
905 generation ability of those close but innocent concept. Thirdly, the retainability of the rest unrelated  
906 prompts (UP) are evaluated, which is the last quantitative evaluation metric. The results reported in  
907 Tab. 3 are averaged over all the unlearning cases shown above.

## 908 B.6 Experiment Details of Sequential Unlearning

909 In Sec. 4, we also evaluated the MU methods with the task of sequential unlearning (SU), where  
910 the efficacy of MU methods in handling multiple sequential unlearning requests  $\{\mathcal{T}_i\}$  are evaluated.  
911 This requires models not only to unlearn new targets effectively but also to maintain the unlearning  
912 of previous targets, while retaining all other knowledge. In the experiments, 6 styles are randomly  
913 selected as the unlearning targets and excluded from the RA evaluation. The UA of all the already  
914 unlearned target will be assessed each time a new request is accomplished. The selected 6 styles  
915 include:

- 916 • Abstractionism
- 917 • Byzantine
- 918 • Cartoon
- 919 • Cold Warm
- 920 • Ukiyoe
- 921 • Van Gogh

922 After each unlearning request, the unlearning effectiveness and retainability are evaluated. Specifically,  
 923 the unlearning accuracy of all the unlearning targets in the previous requests are evaluated to evaluate  
 924 how the unlearning effect lasts when new unlearning requests arrive. In the meantime, the retainability  
 925 of all the other concepts that are not selected as unlearning targets are evaluated, and to ease the  
 926 presentation, the retain accuracy of all the concepts (styles and objects) are averaged and reported.

## 927 B.7 Metrics Summary in All Unlearning Settings

928 Besides the UNLEARNCANVAS dataset, the various quantitative evaluation metrics proposed in this  
 929 work are part of the major contributions to a comprehensive and precise evaluation for DM unlearning  
 930 methods. As there are various unlearning scenarios studied in this work, we provide a summary of  
 931 these metrics in Tab. A1, including their abbreviations, descriptions, and related tables or figures.

Table A1: A summary of the quantitative metrics used in this work, including their abbreviations, meanings and where they are used.

| Metrics                                           | Description                                                                       | Usages (Table & Figure) |
|---------------------------------------------------|-----------------------------------------------------------------------------------|-------------------------|
| Style/Object Unlearning                           |                                                                                   |                         |
| UA                                                | Unlearning accuracy                                                               | Fig. 1, Tab. 1          |
| IRA                                               | In-domain unlearning accuracy                                                     | Fig. 1, Tab. 1          |
| CRA                                               | Cross-domain unlearning accuracy                                                  | Fig. 1, Tab. 1          |
| Unlearning Robustness against Adversarial Prompts |                                                                                   |                         |
| Rob.                                              | Unlearning robustness, unlearning accuracy in the presence of adversarial prompts | Fig. 1                  |
| Style-Object Combination Finer-Scale Unlearning   |                                                                                   |                         |
| FU/UA                                             | Unlearning accuracy in finer-scale unlearning                                     | Fig. 1, Tab. 3          |
| SC                                                | Retainability evaluation of style consistency                                     | Tab. 3                  |
| OC                                                | Retainability evaluation of object consistency                                    | Tab. 3                  |
| UP                                                | Retainability evaluation of unrelated prompts                                     | Tab. 3                  |
| FR                                                | Retainability evaluation in finer-scale unlearning, averaged by SC, OC, and UP    | Fig. 1                  |
| Sequential or Continual Unlearning                |                                                                                   |                         |
| SU or CU                                          | Unlearning accuracy in the context of sequential unlearning                       | Fig. 1, Tab. A5         |
| SR or CR                                          | Retainability in the context of sequential unlearning                             | Fig. 1, Tab. A5         |

932 **C A Detailed Comparison between UNLEARNCANVAS and WIKIART**

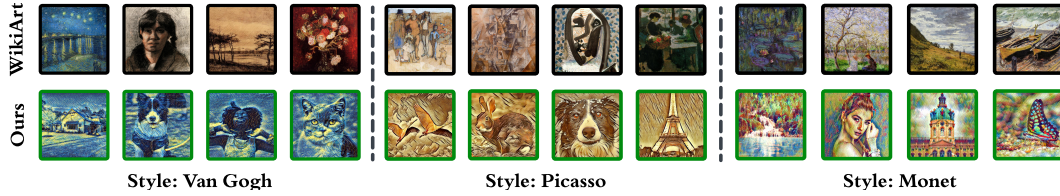

Figure A1: Image examples with the same style label from WIKIART [66] and UNLEARNCANVAS. Images of the same artistic style in UNLEARNCANVAS exhibit high stylistic consistency compared to WIKIART.

933 **UNLEARNCANVAS vs. WIKIART.** To the best of our knowledge, WIKIART [73] is the most  
 934 relevant baseline dataset to ours. In **Tab. A2**, we provide a direct comparison of the key attributes of  
 935 these two datasets. UNLEARNCANVAS differs from WIKIART in the following aspects.

936 **First**, UNLEARNCANVAS includes a greater number of high-resolution images (15M) compared to  
 937 WIKIART (2M), a factor that may enhance the training of state-of-the-art DMs.

Table A2: Comparison with WIKIART, the most relevant dataset containing stylized images to ours. UNLEARNCANVAS stands out notably from WIKIART due to its characteristics of being supervised, balanced, and maintaining high stylistic cohesiveness.

| Dataset       | Resolution (Pixels/Image) | Style-wise Supervised | High Stylistic Consistency | Class-wise Balanced           |
|---------------|---------------------------|-----------------------|----------------------------|-------------------------------|
| WIKIART [73]  | ~ 2M                      | ✗                     | ✗                          | Style-wise ✗<br>Object-wise ✗ |
| UNLEARNCANVAS | ~ 15M                     | ✓                     | ✓                          | Style-wise ✓<br>Object-wise ✓ |

938 **Second**, UNLEARNCANVAS surpasses WIKIART in terms of both intra-style coherence and inter-  
 939 style distinctiveness, as illustrated in **Fig. A1**, where images labeled with ‘Van Gogh Style’ from both  
 940 datasets are compared. In UNLEARNCANVAS, the images exhibit high stylistic consistency, while  
 941 WIKIART lacks the necessary clarity for precise assessment. This will hamper the MU evaluation  
 942 as discussed in the challenges (C2) and (C3). This benefits can also be reflected by the training  
 943 performance using UNLEARNCANVAS and WIKIART. The results are reported in **Tab. A3** and  
 944 **Tab. A4**, respectively. As we can see, the classifier is much more easily trained on UNLEARNCANVAS,  
 945 justifying the higher discernible features within each style in UNLEARNCANVAS.

Table A3: Art style reproduction quality using SD v1.5 and SD v2.0 finetuned on WIKIART. Images are generated with the prompt “A painting in *artist* style”, where *artist* refers to those included in WIKIART. The test accuracy on DM-generated images and original WIKIART test images is reported using the style classifier finetuned from the pretrained ViT-L/16 on WIKIART.

| Image Source | Images by SD v1.5 | Images by SD v2.0 | WIKIART Test Set |
|--------------|-------------------|-------------------|------------------|
| Accuracy     | 41.2%             | 56.7%             | 85.4%            |

946 **Third**, the images in UNLEARNCANVAS are style-wise supervised. For each seed image, a stylized  
 947 counterpart can be find in each style class. This is beneficial for tasks other than unlearning for  
 948 text-to-image task, such as image editing, image stylization, and style transfer, which can provide a  
 949 ground truth image for precise and robust evaluation. This will be detailed in **Appx. F**.



Table A4: Style classification results of a ViT-Large [68] as a style classifier trained on UNLEARN-CANVAS. After convergence, the classifier is tested on the test set and the image set generated by SD v1.5 finetuned on UNLEARNCANVAS.

|          | UNLEARNCANVAS<br>Train Set | UNLEARNCANVAS<br>Test Set | Images by SD v1.5<br>tuned on UNLEARNCANVAS |
|----------|----------------------------|---------------------------|---------------------------------------------|
| Accuracy | 100.0%                     | 99.9%                     | 98.8%                                       |

## 950 D Additional Experiment Results for Unlearning Evaluation

### 951 D.1 Visualization of the Style and Object Unlearning Performance

952 To make a more direct comparison among different MU methods reported in Tab. 1, the results are  
 953 visualized in the radar chart Fig. A2. This figure illustrates that no method dominates across all  
 954 assessment dimensions. This underscores the complexity of unlearning in generative models and the  
 955 need for further improvement.

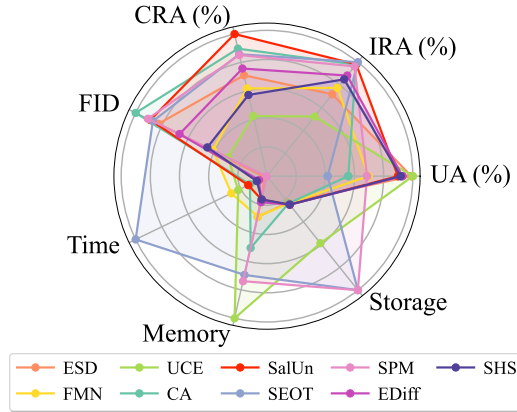

Figure A2: Performance visualization for various unlearning methods as summarized in Table 2. For UA, IRA, and CRA, the results are averaged over the style and object unlearning scenarios. Other metrics undertake the inverse operation as a smaller values represent better performance. Results are normalized to 0% ~ 100% per metric.

### 956 D.2 A Fine-Grained Comparison per Unlearning Target: ESD vs. SALUN

957 Following the analysis of ESD in Fig. 5, we next turn our focus to a comparative analysis with SALUN,  
 958 a method that demonstrated a better balance between unlearning and retaining according to Tab. 2. A  
 959 similar accuracy heatmap for SALUN is presented in Fig. A3. Compared to ESD, SALUN exhibits  
 960 more consistent performance across various unlearning scenarios, as indicated by the more uniform  
 961 color distribution in the heatmap. This also suggests enhanced retainability. However, it is noticeable  
 962 that SALUN does not reach the same level of UA (Unlearning Accuracy) as ESD, as evidenced by the  
 963 darker diagonal values in Fig. A3. This observation reinforces the existence of a trade-off between  
 964 unlearning effectiveness and retainability in the visual generative MU task, a phenomenon paralleled  
 965 in other tasks such as classification.

### 966 D.3 Unlearning Heatmaps of More Unlearning Methods

967 In Fig. A4~Fig. A8, we provide more unlearning heatmap visualizations in the same format as Fig. 5  
 968 and Fig. A3 in order to provide a more detailed unlearning performance dissection for all the DM  
 969 unlearning methods studied in this work.

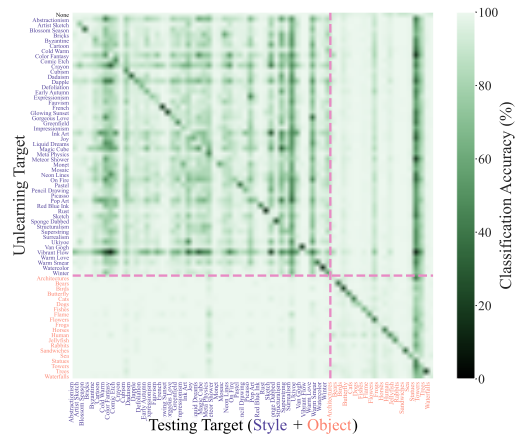

Figure A3: Heatmap visualization of SalUn. The plot setting is identical to Figure 5.

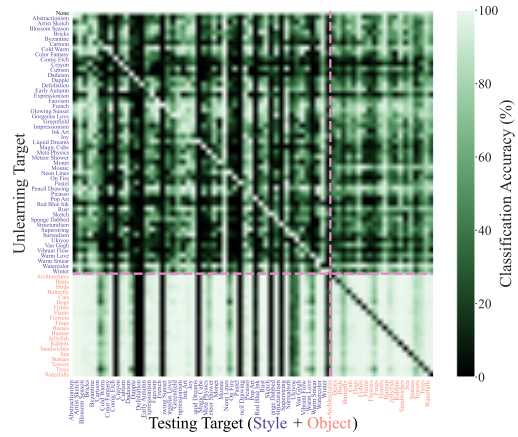

Figure A4: Heatmap visualization of FMN. The plot setting is identical to Figure 5.

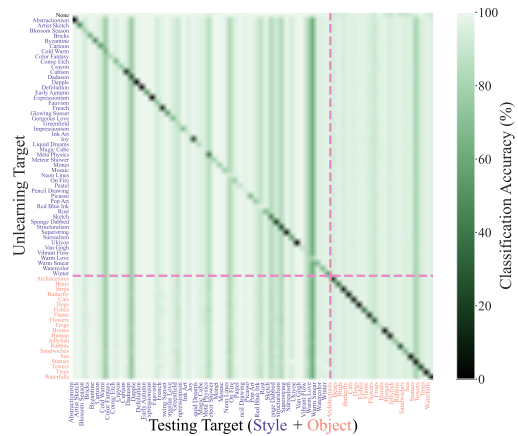

Figure A5: Heatmap visualization of SEOT. The plot setting is identical to Figure 5.

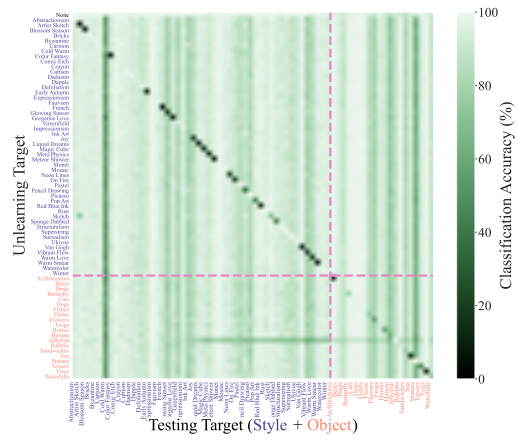

Figure A6: Heatmap visualization of SPM. The plot setting is identical to Figure 5.

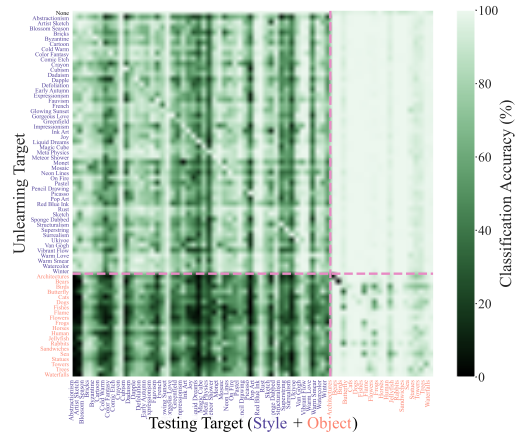

Figure A7: Heatmap visualization of Ediff. The plot setting is identical to Figure 5.

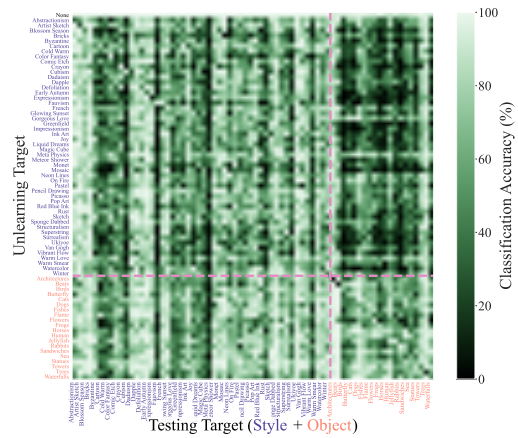

Figure A8: Heatmap visualization of SHS. The plot setting is identical to Figure 5.

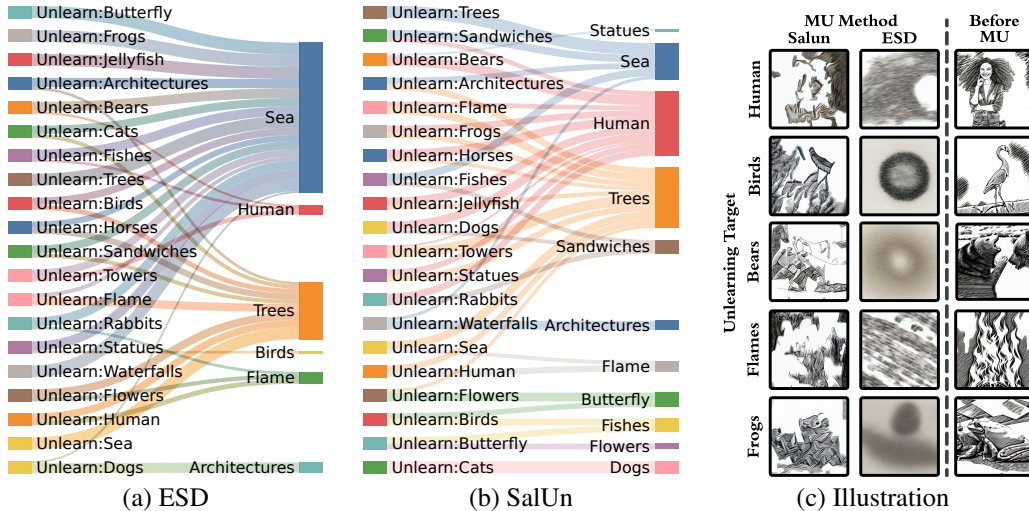

Figure A9: Visualization of the unlearning directions of (a) ESD and (b) SalUn. This figure illustrates the conceptual shift of the generated images of an unlearned model conditioned on the unlearning target. Images generated by the post-unlearning models are classified and used to understand this shift. Edges leading from the object in the left column to the right signify that images generated conditioned on unlearning targets are instead classified as the shifted concepts after unlearning. This reveals the primary unlearning direction for each unlearning method. The most dominant unlearning direction for an object is visualized. Figure (c) provides visualizations of generated images using the prompt template ‘A painting of {object} in Sketch style.’ with *object* being each unlearning target.

970 **D.4 Understanding Unlearning Method’s Behavior via Unlearning Directions**

971 As noted earlier, different unlearning methods display distinct unlearning behaviors. To gain insights  
 972 into the underlying reasons for these differences, **Fig. A9** (a) and (b) visualize the ‘unlearning directions’  
 973 for ESD and SalUn, respectively. These unlearning directions are determined by connecting the  
 974 unlearning target with the predicted label of the generated image from the unlearned DM conditioned  
 975 on the unlearning target. As shown in **Fig. A9** (a), ESD demonstrates a focused shift in image genera-  
 976 tion after object unlearning, with a predominant transition towards generating images labeled by ‘Sea’  
 977 and ‘Trees’. This behavior arises from ESD’s optimization process, designed to steer the generation  
 978 of the DM away from a predefined concept. Consequently, images generated by the ESD-induced  
 979 unlearned model consistently lack clearly identifiable objects, resembling waves and trees, which  
 980 leads to their classification into the ‘Sea’ and ‘Trees’ classes; see **Fig. A9** (c) for examples of generated  
 981 images. In contrast, SalUn exhibits a more diverse range of unlearning directions, shifting images to  
 982 11 different objects. This diversity results from SalUn’s requirement to replace the unlearning target  
 983 with a random concept. As shown in **Fig. A9** (c), images generated by SalUn post-object unlearning  
 984 still maintain some object contours (different from the original unlearning target) and better retain  
 985 style information compared to ESD.

986 **D.5 MU Methods Evaluation in Sequential Unlearning**

987 In this experiment, we evaluated the MU methods with the task of sequential unlearning (SU),  
 988 where the efficacy of MU methods in handling multiple sequential unlearning requests are evaluated.  
 989 More detailed experiment settings are shown in **Appx. B.6**. Here, we consider unlearning 6 styles  
 990 sequentially and the results are presented in **Tab. A5**. We remark that the method SEOT does not  
 991 support sequential unlearning in its original implementation and thus is not included in **Tab. A5**.

992 Our findings reveal significant insights. (1) Degraded retainability: Sequential unlearning requests  
 993 generally degrade retainability across all methods, with RA values frequently dropping below the  
 994 average levels previously seen in **Tab. 2**. Here RA is given by the average of IRA and CRA. (2)  
 995 **Unlearning rebound effect**: Knowledge previously unlearned can be inadvertently reactivated by  
 996 new unlearning requests. This is evidenced by decreasing UA values for earlier objectives as more

Table A5: Performance comparison of different DM unlearning methods in the sequential unlearning setting. Each column represents a new unlearning request, denoted by  $\mathcal{T}_i$ , where  $\mathcal{T}_1$  is the oldest. Each row represents the UA for a specific unlearning objective or the retaining accuracy (RA), given by the average of IRA and CRA. Results indicating *unlearning rebound* effect are highlighted in **orange**, and those signifying *catastrophic retaining failure* are marked in **red**.

| Method: ESD   |                    |                                    |                                    |                                    |                                    |                                    | Method: FMN |                    |                                    |                                    |                                    |                                    |                                    |        |
|---------------|--------------------|------------------------------------|------------------------------------|------------------------------------|------------------------------------|------------------------------------|-------------|--------------------|------------------------------------|------------------------------------|------------------------------------|------------------------------------|------------------------------------|--------|
| Metrics       | $\mathcal{T}_1$    | $\mathcal{T}_1 \sim \mathcal{T}_2$ | $\mathcal{T}_1 \sim \mathcal{T}_3$ | $\mathcal{T}_1 \sim \mathcal{T}_4$ | $\mathcal{T}_1 \sim \mathcal{T}_5$ | $\mathcal{T}_1 \sim \mathcal{T}_6$ | Metrics     | $\mathcal{T}_1$    | $\mathcal{T}_1 \sim \mathcal{T}_2$ | $\mathcal{T}_1 \sim \mathcal{T}_3$ | $\mathcal{T}_1 \sim \mathcal{T}_4$ | $\mathcal{T}_1 \sim \mathcal{T}_5$ | $\mathcal{T}_1 \sim \mathcal{T}_6$ |        |
|               | Unlearning Request |                                    |                                    |                                    |                                    |                                    |             | Unlearning Request |                                    |                                    |                                    |                                    |                                    |        |
| UA            | $\mathcal{T}_1$    | 100%                               | 99%                                | 95%                                | 87%                                | 81%                                | 75%         | $\mathcal{T}_1$    | 88%                                | 99%                                | 99%                                | 98%                                | 99%                                | 99%    |
|               | $\mathcal{T}_2$    | -                                  | 100%                               | 100%                               | 96%                                | 87%                                | 79%         | $\mathcal{T}_2$    | -                                  | 95%                                | 99%                                | 99%                                | 98%                                | 99%    |
|               | $\mathcal{T}_3$    | -                                  | -                                  | 100%                               | 98%                                | 99%                                | 98%         | $\mathcal{T}_3$    | -                                  | -                                  | 97%                                | 98%                                | 99%                                | 99%    |
|               | $\mathcal{T}_4$    | -                                  | -                                  | -                                  | 100%                               | 99%                                | 99%         | $\mathcal{T}_4$    | -                                  | -                                  | -                                  | 99%                                | 99%                                | 99%    |
|               | $\mathcal{T}_5$    | -                                  | -                                  | -                                  | -                                  | 100%                               | 99%         | $\mathcal{T}_5$    | -                                  | -                                  | -                                  | -                                  | 99%                                | 99%    |
|               | $\mathcal{T}_6$    | -                                  | -                                  | -                                  | -                                  | -                                  | 100%        | $\mathcal{T}_6$    | -                                  | -                                  | -                                  | -                                  | -                                  | 100%   |
| RA            | RA                 | 77.46%                             | 52.94%                             | 35.99%                             | 24.86%                             | 18.69%                             | 12.95%      | RA                 | 82.39%                             | 14.56%                             | 13.34%                             | 10.42%                             | 9.83%                              | 8.76%  |
| Method: UCE   |                    |                                    |                                    |                                    |                                    |                                    | Method: CA  |                    |                                    |                                    |                                    |                                    |                                    |        |
| Metrics       | $\mathcal{T}_1$    | $\mathcal{T}_1 \sim \mathcal{T}_2$ | $\mathcal{T}_1 \sim \mathcal{T}_3$ | $\mathcal{T}_1 \sim \mathcal{T}_4$ | $\mathcal{T}_1 \sim \mathcal{T}_5$ | $\mathcal{T}_1 \sim \mathcal{T}_6$ | Metrics     | $\mathcal{T}_1$    | $\mathcal{T}_1 \sim \mathcal{T}_2$ | $\mathcal{T}_1 \sim \mathcal{T}_3$ | $\mathcal{T}_1 \sim \mathcal{T}_4$ | $\mathcal{T}_1 \sim \mathcal{T}_5$ | $\mathcal{T}_1 \sim \mathcal{T}_6$ |        |
|               | Unlearning Request |                                    |                                    |                                    |                                    |                                    |             | Unlearning Request |                                    |                                    |                                    |                                    |                                    |        |
| UA            | $\mathcal{T}_1$    | 93%                                | 95%                                | 98%                                | 96%                                | 97%                                | 98%         | $\mathcal{T}_1$    | 58%                                | 55%                                | 59%                                | 45%                                | 44%                                | 40%    |
|               | $\mathcal{T}_2$    | -                                  | 97%                                | 98%                                | 98%                                | 98%                                | 95%         | $\mathcal{T}_2$    | -                                  | 76%                                | 58%                                | 51%                                | 47%                                | 44%    |
|               | $\mathcal{T}_3$    | -                                  | -                                  | 95%                                | 97%                                | 98%                                | 99%         | $\mathcal{T}_3$    | -                                  | -                                  | 45%                                | 41%                                | 40%                                | 37%    |
|               | $\mathcal{T}_4$    | -                                  | -                                  | -                                  | 98%                                | 98%                                | 98%         | $\mathcal{T}_4$    | -                                  | -                                  | -                                  | 71%                                | 70%                                | 60%    |
|               | $\mathcal{T}_5$    | -                                  | -                                  | -                                  | -                                  | 97%                                | 99%         | $\mathcal{T}_5$    | -                                  | -                                  | -                                  | -                                  | 69%                                | 51%    |
|               | $\mathcal{T}_6$    | -                                  | -                                  | -                                  | -                                  | -                                  | 99%         | $\mathcal{T}_6$    | -                                  | -                                  | -                                  | -                                  | -                                  | 57%    |
| RA            | RA                 | 81.42%                             | 29.38%                             | 18.72%                             | 15.34%                             | 13.32%                             | 11.31%      | RA                 | 97.24%                             | 93.39%                             | 84.46%                             | 79.32%                             | 71.40%                             | 60.53% |
| Method: SalUn |                    |                                    |                                    |                                    |                                    |                                    | Method: SPM |                    |                                    |                                    |                                    |                                    |                                    |        |
| Metrics       | $\mathcal{T}_1$    | $\mathcal{T}_1 \sim \mathcal{T}_2$ | $\mathcal{T}_1 \sim \mathcal{T}_3$ | $\mathcal{T}_1 \sim \mathcal{T}_4$ | $\mathcal{T}_1 \sim \mathcal{T}_5$ | $\mathcal{T}_1 \sim \mathcal{T}_6$ | Metrics     | $\mathcal{T}_1$    | $\mathcal{T}_1 \sim \mathcal{T}_2$ | $\mathcal{T}_1 \sim \mathcal{T}_3$ | $\mathcal{T}_1 \sim \mathcal{T}_4$ | $\mathcal{T}_1 \sim \mathcal{T}_5$ | $\mathcal{T}_1 \sim \mathcal{T}_6$ |        |
|               | Unlearning Request |                                    |                                    |                                    |                                    |                                    |             | Unlearning Request |                                    |                                    |                                    |                                    |                                    |        |
| UA            | $\mathcal{T}_1$    | 84%                                | 79%                                | 78%                                | 65%                                | 67%                                | 64%         | $\mathcal{T}_1$    | 55%                                | 59%                                | 50%                                | 49%                                | 47%                                | 48%    |
|               | $\mathcal{T}_2$    | -                                  | 81.42%                             | 75%                                | 72%                                | 69%                                | 61%         | $\mathcal{T}_2$    | -                                  | 62%                                | 59%                                | 58%                                | 60%                                | 63%    |
|               | $\mathcal{T}_3$    | -                                  | -                                  | 90%                                | 85%                                | 84%                                | 87%         | $\mathcal{T}_3$    | -                                  | -                                  | 42%                                | 39%                                | 40%                                | 41%    |
|               | $\mathcal{T}_4$    | -                                  | -                                  | -                                  | 84%                                | 86%                                | 81%         | $\mathcal{T}_4$    | -                                  | -                                  | -                                  | 57%                                | 59%                                | 60%    |
|               | $\mathcal{T}_5$    | -                                  | -                                  | -                                  | -                                  | 79%                                | 81%         | $\mathcal{T}_5$    | -                                  | -                                  | -                                  | -                                  | 51%                                | 51%    |
|               | $\mathcal{T}_6$    | -                                  | -                                  | -                                  | -                                  | -                                  | 89%         | $\mathcal{T}_6$    | -                                  | -                                  | -                                  | -                                  | -                                  | 43%    |
| RA            | RA                 | 85.43%                             | 80.32%                             | 71.42%                             | 65.41%                             | 63.24%                             | 60.19%      | RA                 | 72.39%                             | 70.42%                             | 67.89%                             | 60.45%                             | 55.32%                             | 51.12% |
| Method: EDiff |                    |                                    |                                    |                                    |                                    |                                    | Method: SHS |                    |                                    |                                    |                                    |                                    |                                    |        |
| Metrics       | $\mathcal{T}_1$    | $\mathcal{T}_1 \sim \mathcal{T}_2$ | $\mathcal{T}_1 \sim \mathcal{T}_3$ | $\mathcal{T}_1 \sim \mathcal{T}_4$ | $\mathcal{T}_1 \sim \mathcal{T}_5$ | $\mathcal{T}_1 \sim \mathcal{T}_6$ | Metrics     | $\mathcal{T}_1$    | $\mathcal{T}_1 \sim \mathcal{T}_2$ | $\mathcal{T}_1 \sim \mathcal{T}_3$ | $\mathcal{T}_1 \sim \mathcal{T}_4$ | $\mathcal{T}_1 \sim \mathcal{T}_5$ | $\mathcal{T}_1 \sim \mathcal{T}_6$ |        |
|               | Unlearning Request |                                    |                                    |                                    |                                    |                                    |             | Unlearning Request |                                    |                                    |                                    |                                    |                                    |        |
| UA            | $\mathcal{T}_1$    | 97%                                | 93%                                | 91%                                | 93%                                | 85%                                | 90%         | $\mathcal{T}_1$    | 81%                                | 73%                                | 74%                                | 93%                                | 94%                                | 97%    |
|               | $\mathcal{T}_2$    | -                                  | 92%                                | 89%                                | 93%                                | 91%                                | 87%         | $\mathcal{T}_2$    | -                                  | 69%                                | 61%                                | 89%                                | 94%                                | 97%    |
|               | $\mathcal{T}_3$    | -                                  | -                                  | 96%                                | 93%                                | 90%                                | 84%         | $\mathcal{T}_3$    | -                                  | -                                  | 75%                                | 92%                                | 96%                                | 90%    |
|               | $\mathcal{T}_4$    | -                                  | -                                  | -                                  | 91%                                | 92%                                | 90.22%      | $\mathcal{T}_4$    | -                                  | -                                  | -                                  | 91%                                | 95%                                | 97%    |
|               | $\mathcal{T}_5$    | -                                  | -                                  | -                                  | -                                  | 99%                                | 97%         | $\mathcal{T}_5$    | -                                  | -                                  | -                                  | -                                  | 92%                                | 96%    |
|               | $\mathcal{T}_6$    | -                                  | -                                  | -                                  | -                                  | -                                  | 94%         | $\mathcal{T}_6$    | -                                  | -                                  | -                                  | -                                  | -                                  | 94%    |
| RA            | RA                 | 92.34%                             | 89.37%                             | 14.35%                             | 12.31%                             | 12.82%                             | 7.42%       | RA                 | 88.41%                             | 84.32%                             | 73.98%                             | 69.19%                             | 10.76%                             | 10.11% |

997 unlearning tasks are introduced, a trend highlighted in **orange**. This suggests that residual knowledge  
998 remains within the model and can be reactivated, aligning with findings from Fig. 6. This indicates  
999 the unlearned models by some MU methods do not essentially lose the generation ability of the  
1000 unlearning target. (3) **Catastrophic retaining failure**: RA significantly drops at a certain request,  
1001 exemplified by a sudden decrease in RA of UCE from 81.42% to 29.38% after the second request,  $\mathcal{T}_2$ .  
1002 This indicates that the seemingly acceptable side effects generated by some unlearning methods will  
1003 drastically modify the knowledge representations when accumulated. This experiment illuminates  
1004 the complex dynamics of knowledge removal and retention within DMs and highlights the potential  
1005 pitfalls of existing unlearning methods when faced with sequential unlearning tasks. The observation  
1006 of the ‘unlearning rebound effect’ and ‘catastrophic retaining failure’ particularly emphasizes the  
1007 need for a more nuanced understanding of how knowledge is managed within DMs.

1008 **E Visualizations**

1009 In this section, we aim to provide plenty of visualizations, illustrations, and qualitative results of the  
 1010 dataset and the quantitative results shown in Sec. 4 and Appx. D. These visualizations are intended to  
 1011 deepen the understanding of the effects of different MU methods and clearly illustrate the challenges  
 1012 identified in previous sections. We hope these visual aids will enable readers to more effectively  
 1013 grasp the nuances of MU methods and their implications for DMs (Diffusion Models).

1014 **E.1 Illustrations of the Styles and Objects in UNLEARNCANVAS**

1015 We first provide an illustration of the styles and object classes included in UNLEARNCANVAS.  
 1016 Specifically, we show the styles in Fig. A10 and object classes in Fig. A11 with the style and object  
 1017 names disclosed in the captions.

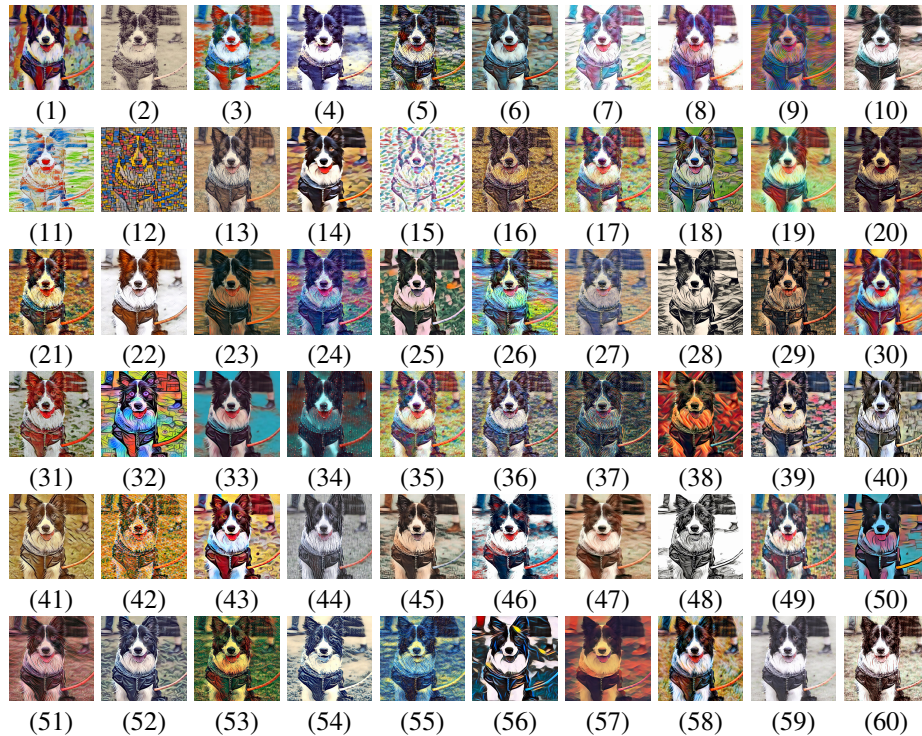

Figure A10: An illustration of the images in each style in UNLEARNCANVAS used in, which are stylized from the same seed image from the ‘Dogs’ object class. The seed image is presented in Fig. A11 (6). Images are cropped and down-scaled for illustration purpose. The name of the styles are: (1) Abstractionism; (2) Artist Sketch; (3) Blossom Season; (4) Blue Blooming; (5) Bricks; (6) Byzantine; (7) Cartoon; (8) Cold Warm; (9) Color Fantasy; (10) Comic Etch; (11) Crayon; (12) Crypto Punks; (13) Cubism; (14) Dadaism; (15) Dapple; (16) Defoliation; (17) Dreamweave; (18) Early Autumn; (19) Expressionism; (20) Fauvism; (21) Foliage Patchwork; (22) French; (23) Glowing Sunset; (24) Gorgeous Love; (25) Greenfield; (26) Impasto; (27) Impressionism; (28) Ink Art; (29) Joy; (30) Liquid Dreams; (31) Palette Knife; (32) Magic Cube; (33) Meta Physics; (34) Meteor Shower; (35) Monet; (36) Mosaic; (37) Neon Lines; (38) On Fire; (39) Pastel; (40) Pencil Drawing; (41) Picasso; (42) Pointillism; (43) Pop Art; (44) Rainwash; (45) Realistic Watercolor; (46) Red Blue Ink; (47) Rust; (48) Sketch; (49) Sponge Dabbed; (50) Structuralism; (51) Superstring; (52) Surrealism; (53) Techno; (54) Ukiyoe; (55) Van Gogh; (56) Vibrant Flow; (57) Warm Love; (58) Warm Smear; (59) Watercolor; (60) Winter.

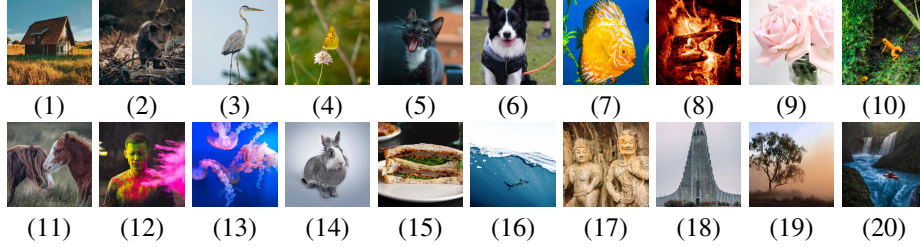

Figure A11: An illustration of the seed images in each object class in UNLEARNCANVAS. Images are cropped and down-scaled for illustration purpose. The name of the object classes are: (1) Architecture; (2) Bear; (3) Bird; (4) Butterfly; (5) Cat; (6) Dog; (7) Fish; (8) Flame; (9) Flowers; (10) Frog; (11) Horse; (12) Human; (13) Jellyfish; (14) Rabbits; (15) Sandwich; (16) Sea; (17) Statue; (18) Tower; (19) Tree; (20) Waterfalls.

## 1018 E.2 Visualization of Style Unlearning

1019 In Fig. A12, we provide abundant generation examples of all the 9 methods benchmarked in this  
 1020 work in a case study of unlearning the ‘Cartoon’ style. Both the successful and failure cases are  
 1021 demonstrated in the context of unlearning effectiveness, in-domain retainability, and cross-domain  
 1022 retainability.

## 1023 E.3 Visualization of the Unlearning Performance in the Presence of Adversarial Prompts

1024 In Fig. A13, we provide visualizations for the effect of adversarial prompts. As revealed in Fig. 6, all  
 1025 the DM unlearning methods experience a significant drop in unlearning effectiveness when attacked  
 1026 by the adversarial prompt, enabled by UnlearnDiffAtk [59]. We provide the image generation in four  
 1027 unlearning cases (two for style unlearning and two for object unlearning), and show the images of the  
 1028 unlearning target successfully generated in the presence of adversarial prompts.

### Unlearning Target Concept - **Cartoon** style

Unlearning Effectiveness Evaluation: Test Prompt Template: "An image of {object} in **Cartoon** style"

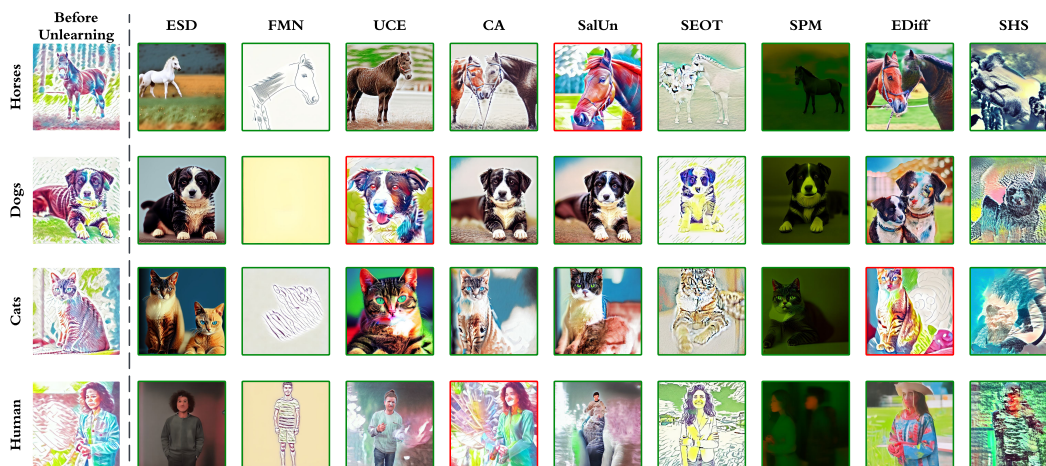

In-Domain Retainability Evaluation: Test Prompt Template: "An image of Horses in [style] style"

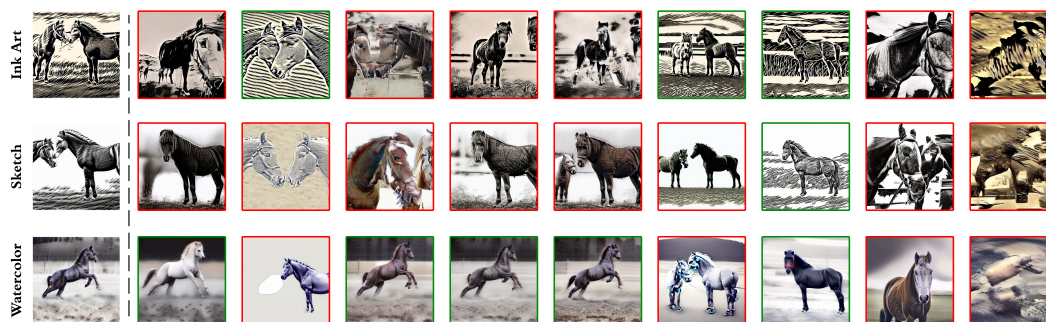

Cross-Domain Retainability Evaluation: Test Prompt Template: "An image of {object}."

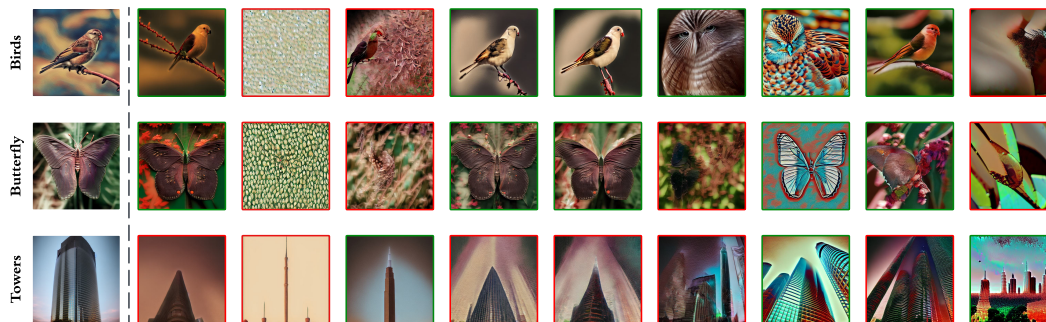

Figure A12: visualization of the unlearning performance of different methods on the task of style unlearning. Three text prompt templates are used to evaluate the unlearning effectiveness, in-domain retainability, and cross-domain retainability of each method. Images with **green** frame denote desirable results, while the ones with **red** frame denote unlearning or retaining failures.



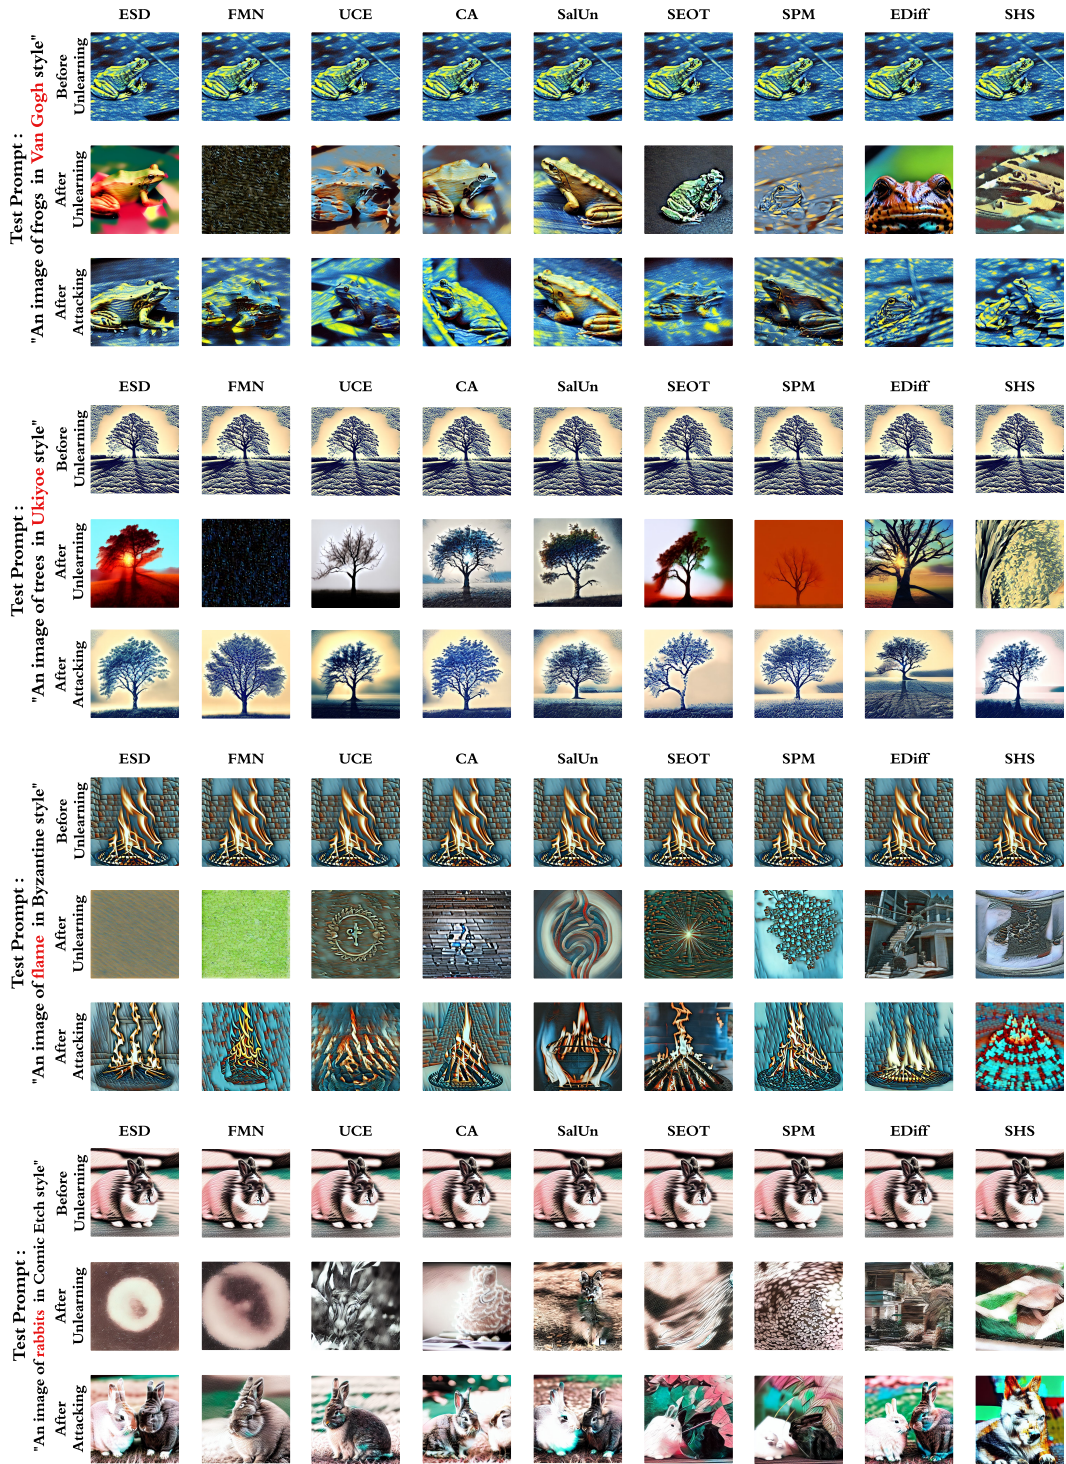

Figure A13: Visualization of the images generated by the unlearned DMs using different unlearning methods in the absence or presence of adversarial prompts.

1029 **F Broader Use Cases of UNLEARNCANVAS**

1030 Although UNLEARNCANVAS is originally designed for benchmarking MU methods, we would like  
 1031 to demonstrate its broader use cases of benchmarking more generative modeling tasks, thanks to  
 1032 its good properties discussed in Sec. 3. In this section, we start with a case study on the task of  
 1033 style transfer, which is a much more well-studied topic than MU, but surprisingly also faces great  
 1034 challenges in building up a comprehensive and precise evaluation framework. In the next, we will first  
 1035 dissect the key challenges of the current style transfer evaluation framework, and then demonstrate  
 1036 how UNLEARNCANVAS efficiently resolves these challenges and further proposes a comprehensive  
 1037 and automated benchmark. Through extensive experiments, we draw demonstrate new insights from  
 1038 these results and illuminate the challenges of the future research directions. In the end, we will  
 1039 discuss the possibility of using UNLEARNCANVAS to benchmark more generative modeling tasks.

1040 **F.1 Benchmarking Style Transfer using UNLEARNCANVAS**

1041 **Style transfer.** Style transfer is a long-standing topic  
 1042 and focuses on transferring the artistic style from one style  
 1043 image (also known as the *reference* image)  $\mathbf{x}_s$  to a target  
 1044 content image  $\mathbf{x}_c$ . The most recent methods typically  
 1045 employ a neural network, denoted by  $\theta_s$ , to extract style  
 1046 features and perform stylization in a single inference step,  
 1047 expressed as  $\hat{\mathbf{x}}_o = f_{\theta_s}(\mathbf{x}_s, \mathbf{x}_c)$ . Current state-of-the-art  
 1048 (SOTA) style transfer techniques exhibit remarkable generalization  
 1049 capabilities, successfully transferring styles not  
 1050 encountered during training and not requiring any further  
 1051 back-propagations. Figure 1 illustrates the pipeline of this  
 1052 task. Most existing literature [74–79] utilize WIKIART  
 1053 [66] to provide different styles for training the stylization  
 1054 network  $\theta_s$ . During the evaluation, the validation set of  
 1055 WIKIART will serve as the style (reference) images, together  
 1056 with the content images from the COCO dataset [80], to form a test  
 1057 bed for style transfer and style learning methods. However, such an  
 1058 evaluation scheme has some inherent limitations, which will be  
 detailed below.

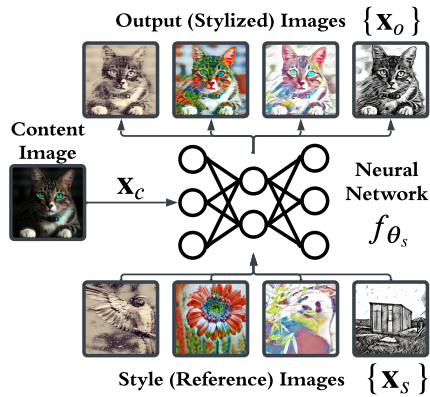

Figure A14: An illustration of the task of style transfer.

1059 **Issues and challenges in the evaluating methods for style transfer** Although the task of style  
 1060 transfer has been widely studied, its evaluations are still based on very limited quantitative or even  
 1061 sorely qualitative assessments, potentially leading to incomplete and inaccurate assessments [81].  
 1062 Upon examining the evaluation pipelines of over 10 state-of-the-art (SOTA) style transfer methods,  
 1063 three significant challenges are identified within the current widely accepted evaluation frameworks.  
 1064 • **Challenge I (C1): The lack of the ground truth images for style similarity evaluation.** Unlike  
 1065 other vision tasks like classification [82], detection [83], and segmentation [84], one of the key  
 1066 shortcomings of the current style transfer evaluation lies in the lack of the ground truth images  $\mathbf{x}_g$   
 1067 for the given reference style image  $\mathbf{x}_s$  and the content image  $\mathbf{x}_c$ . Consequently, existing evaluation  
 1068 metrics, such as the style loss  $\ell_{\text{style}}$  [85, 86], has to be calculated with the reference style image  $\mathbf{x}_s$   
 1069 as the ground truth  $\mathbf{x}_g$ , namely  $\ell_{\text{style}}(\mathbf{x}_s, \hat{\mathbf{x}}_o)$ , rather than directly using the ground truth  $\ell_{\text{style}}(\mathbf{x}_o, \mathbf{x}_g)$ .  
 1070 Obviously, such an indirect evaluation may lead to inaccurate results due to the different contents held  
 1071 in  $\mathbf{x}_s$  and  $\mathbf{x}_o$ . Existing work has demonstrated that such evaluation metrics can lead to very different  
 1072 conclusion from that of the user study [79]. Therefore, the creation of a *supervised* dataset with  
 1073 ground truth stylized images for every content image under each style is a timely remedy. • **Challenge**  
 1074 **II (C2): The lack of algorithm stability evaluation against varied reference images  $\mathbf{x}_s$ .** The  
 1075 evaluation of algorithm stability in style transfer has often been neglected. This assessment requires  
 1076 consistent performance of a method on a content image  $\mathbf{x}_c$  across different style reference images  $\mathbf{x}_s$   
 1077 representing the same target artistic style. Ideally, an algorithm should maintain uniform quality across  
 1078 various references within a style, avoiding significant performance variations. Current challenges in

1079 such evaluations stem from the lack of reference sets that exhibit *high stylistic consistency* within  
 1080 each style. Figure A1 showcases examples from the widely-used WIKIART dataset. Despite sharing  
 1081 the same artistic label, images within a row show considerable divergence in visual appearance and  
 1082 style. Consequently, using these images as style references can lead to stable algorithms producing  
 1083 stylistically varied outputs, leading to misleading assessment results. Therefore, creating a dataset  
 1084 with high stylistic uniformity within each style category and clear differentiation between styles is  
 1085 crucial for accurate measurement of algorithm stability.

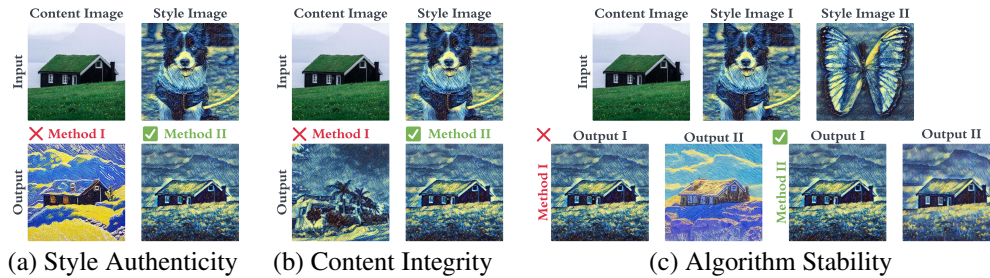

Figure A15: An illustration of comprehensive performance metrics for style transfer tasks. (a) Style authenticity measures the style similarity between the generated image and the style image. (b) Content integrity measures the content preservation between the generated image and the content image. (c) Algorithm stability reflects the sensitivity of the algorithm to different style images. For all the metrics in the illustration, “Method II” is always better than “Method I”.

1086 **Building up a comprehensive evaluation pipeline with UNLEARNCANVAS for style transfer.**  
 1087 To revolutionize the evaluation framework with UNLEARNCANVAS, it is crucial to first understand  
 1088 the components that form a comprehensive evaluation pipeline, ensuring a thorough and impartial  
 1089 assessment of performance. In the realm of style transfer, three pivotal metrics stand paramount, as  
 1090 depicted in **Figure A15**:

1091 ① **Style Authenticity**: Assesses the extent to which the style of the generated image aligns with that of  
 1092 the provided reference style image(s). ② **Content Integrity**: Measures how well the content features  
 1093 are preserved post style transfer. ③ **Algorithm Stability**: Evaluates the algorithm’s robustness against  
 1094 variations in content subjects, target styles, or style reference image selections, while keeping other  
 1095 parameters constant.

1096 In addressing the challenges (C1-C2), UNLEARNCANVAS proves to be inherently advantageous.  
 1097 **First**, the style-specific supervision embedded in UNLEARNCANVAS enables the provision of ground  
 1098 truth for quantitative evaluations of stylized images. **Second**, the extensive image collection within  
 1099 the same style category in UNLEARNCANVAS allows for the assessment of algorithm stability by  
 1100 applying style transfer methods to varied reference images. To encompass the aforementioned aspects  
 1101 of style transfer performance, we propose the following quantitative evaluation metrics:

1102 ① **Style Loss**: Utilizes a feature map-based style loss [87] to quantify the stylistic *dissimilarity*  
 1103 between image pairs, effectively representing the inverse of style authenticity. ② **Content Loss**:  
 1104 Employs a VGG-based, feature-map content loss [87, 88] to measure the visual dissimilarity between  
 1105 the reference and generated images, essentially mirroring content integrity. ③ **Averaged Standard**  
 1106 **Deviation (STD)**: Computes the average STD of style and content loss *w.r.t.* the same reference  
 1107 image, reflecting algorithm stability.

1108 Furthermore, similar to the MU task, we also consider efficiency metrics for each method, including:

1109 ④ **Average Time Consumption**: Measures the time required for performing style transfer. ⑤ **Peak**  
 1110 **GPU Memory Consumption**: Records the maximum GPU memory usage during the style transfer  
 1111 process. ⑥ **Model Storage Memory Consumption**: Assesses the memory requirement for storing the  
 1112 style transfer model.

1113 With the introduction of evaluation metrics (①-⑥), we establish a comprehensive evaluation pipeline  
 1114 for style transfer. The process is as follows:

1115 For each style transfer method, style transfer is executed within each object class. Specifically,  
 1116 for every style, images indexed from 1 to 18 serve as style reference images, while seed images  
 1117 corresponding to indices 19 and 20 are used as content images. Style and content loss are computed  
 1118 for each pair of style reference and content images, with the stylized images derived from the used  
 1119 seed content images serving as the ground truth for style loss. This results in a total of  $60 \times 20 \times 18 \times 2$   
 1120 experimental trials for each method. For a specific style and content image pair, 18 experiments are  
 1121 performed to calculate the Standard Deviation (STD) values for both style and content loss. These  
 1122 STD values are then averaged over all content images (amounting to  $60 \times 20 \times 2$  cases). The findings  
 1123 from these comprehensive evaluations are presented in Table A6.

1124 Following this evaluation pipeline, we scrutinized 9 prominent style transfer methods, including  
 1125 SANET [78], MCC [89], MAST [90], ARTFLOW with its two variants (AF-ADAIN and AF-WCT)  
 1126 [79], IE-CONTRAST [91], CAST [88], STYTR2 [87], and BLIP [92].

Table A6: Performance overview of different style transfer methods evaluated with UNLEARNCANVAS dataset. The performance are assessed from the perspectives of stylistic authenticity (style loss), content integrity (content loss), algorithm stability (standard deviations from different dimensions), and efficiency. For all the metrics, *smaller* values are always preferred for better performance. The best performance per each metric is highlighted in **bold**. The standard deviations are first calculated with respect to different styles, object classes, or tested content images and then averaged in order to depict the algorithm stability from different perspectives.

| Method      | Style Loss<br>STD (Averaged over) |             |             |               | Content Loss<br>STD (Averaged over) |             |             |               | Efficiency     |             |              |
|-------------|-----------------------------------|-------------|-------------|---------------|-------------------------------------|-------------|-------------|---------------|----------------|-------------|--------------|
|             | Mean                              | Style       | Object      | Content Image | Mean                                | Style       | Object      | Content Image | Time (s/image) | Memory (GB) | Storage (GB) |
| SANET       | 23.48                             | <b>2.73</b> | <b>2.87</b> | 1.87          | 0.85                                | 0.12        | 0.17        | 0.09          | 0.29           | <b>2.3</b>  | 0.11         |
| MCC         | <b>17.92</b>                      | 4.59        | 4.82        | 2.14          | 0.96                                | 0.14        | 0.21        | 0.07          | 0.38           | 5.4         | 0.10         |
| MAST        | 24.10                             | 2.87        | 3.16        | 1.74          | 1.42                                | 0.33        | 0.34        | 0.18          | 2.86           | 4.8         | 0.16         |
| AF-ADAIN    | 20.78                             | 2.96        | 3.13        | 1.65          | 1.09                                | 0.11        | 0.19        | 0.05          | 0.53           | 6.3         | 0.08         |
| AF-WCT      | 20.22                             | 2.94        | 3.19        | 1.75          | 1.02                                | 0.12        | 0.18        | 0.05          | 0.53           | 6.3         | <b>0.08</b>  |
| IE-CONTRAST | 21.27                             | 3.01        | 3.32        | 2.05          | 1.08                                | 0.29        | 0.31        | 0.15          | <b>0.05</b>    | 3.8         | 0.11         |
| CAST        | 24.01                             | 2.78        | 2.90        | <b>1.35</b>   | 1.38                                | 0.32        | 0.40        | 0.16          | 0.32           | 6.7         | 0.19         |
| STYTR2      | 19.75                             | 3.04        | 3.30        | 1.91          | <b>0.62</b>                         | <b>0.10</b> | <b>0.12</b> | <b>0.04</b>   | 0.58           | 3.9         | 0.21         |
| BLIP        | 25.43                             | 2.90        | 3.06        | 2.03          | 1.61                                | 0.30        | 0.34        | 0.16          | 8.87           | 7.2         | 7.23         |

1127 **Experiment results analysis.** Tab. A6 provides a systematic evaluation of the performance of  
 1128 various methods tested. From the analysis, we can derive several crucial insights:

1129 **First**, it is evident that no single method excels across all evaluation metrics. Notably, MCC  
 1130 demonstrates superior performance in maintaining stylistic authenticity, as indicated by a low style  
 1131 loss. Conversely, STYTR2 stands out in preserving content integrity, reflected by its minimal content  
 1132 loss.

1133 **Second**, the assessment of standard deviation is indispensable for a comprehensive evaluation. The  
 1134 method with the optimal performance does not necessarily exhibit the greatest stability. This is  
 1135 particularly apparent in the style loss evaluation, where MCC, despite achieving the best result in  
 1136 terms of style loss, exhibits the least stability, denoted by the highest standard deviation.

## 1137 F.2 Other Possible Applications of UNLEARNCANVAS

1138 In the preceding section, we demonstrated the application of UNLEARNCANVAS in refining evaluation  
 1139 metrics and frameworks for style transfer. Beyond this, we recognize the potential of UNLEARNCAN-  
 1140 VAS in diverse domains. Here, we delve into two illustrative examples:

1141 **Bias mitigation.** Bias mitigation in DMs, which are now gaining popularity, can also benefit from  
 1142 UNLEARNCANVAS. Its hierarchical and balanced architecture enables the deliberate introduction of  
 1143 artificial biases by selectively omitting data from specific groups. For instance, by predominantly  
 1144 excluding images from styles other than the ‘Van Gogh Style’ within the ‘Dogs’ class, DMs finetuned  
 1145 on this dataset will inherently exhibit a tendency to generate images of dogs in the Van Gogh style,  
 1146 particularly when the style is not explicitly specified in the prompt. This approach not only allows

1147 for the manipulation and quantification of biases but also paves the way for UNLEARNCANVAS to  
1148 become a standardized benchmark for bias mitigation, similar to the role of MU for DMs.

1149 **Vision in-context learning (V-ICL).** V-ICL [93–96] is another domain where UNLEARNCANVAS  
1150 can be effectively applied. The field of V-ICL is in urgent need of robust, comprehensive methods  
1151 for the fair assessment of existing models. In this context, the image pairs from UNLEARNCANVAS  
1152 are ideally suited for evaluating various tasks such as style transfer, image inpainting, and image  
1153 segmentation, offering a rich resource for nuanced and quantitative analyses.

## 1154 **G Impact Statement**

1155 This work helps improve the assessment and further promotes the advancement of MU (machine  
1156 unlearning) methods for DMs (diffusion models), which are known to be effective in relieving or  
1157 mitigating the various negative societal influences brought by the prevalent usage of DMs, which  
1158 include but are not limited to the following aspects.

1159 • **Avoiding Copyright Issues.** There is an urgent need for the generative model providers to scrub the  
1160 influence of certain data on an already-trained model. In January 2023, a notable lawsuit targeted two  
1161 leading AI art generators, Stable Diffusion [1] and Midjourney [2], for alleged copyright infringement.  
1162 Concurrently, incidents with the recently released Midjourney V6 [2] also highlighted a visual  
1163 plagiarism issue on famous film scenes. These instances illuminate the broad copyright challenges  
1164 inherent in the way of training data collection method of those foundation generative models’ training  
1165 datasets. MU methods can be used as an effective method to remove the influence of the private data  
1166 and avoid unnecessary retraining.

1167 • **Mitigating biases and stereotypes.** Generative AI systems are known to have tendencies towards  
1168 bias, stereotypes, and reductionism, when it comes to gender, race and national identities [17]. For  
1169 example, a recent study on the images generated with Midjourney revealed, that images associated  
1170 with higher-paying job titles featured people with lighter skin tones, and that results for most  
1171 professional roles were male-dominated [16]. MU is known to be effective in eliminating biases  
1172 rooted in the training data. Moreover, UNLEARNCANVAS offers a flexible framework to benchmark  
1173 MU techniques against bias removal, allowing for the creation and quantitative control of biases  
1174 across different object classes for comprehensive bias removal studies.
